# Supplementary material for: Kinesin Kif2C in regulation of DNA double strand break dynamics and repair
Source: eLife journal article supplement (doi:10.7554/elife.53402), 2020-01-17
Supplement: supp [file elife-53402-supp-v1.zip]

Archive with 18 entries (18 files):
- elife_poa_e53402_Figure_2_figure_supplement_2.pdf
- elife_poa_e53402_Video_2.avi
- elife_poa_e53402_Figure_3_figure_supplement_1.pdf
- elife_poa_e53402_Figure_2_figure_supplement_3.pdf
- elife_poa_e53402_Figure_3_figure_supplement_3.pdf
- elife_poa_e53402_Figure_5_figure_supplement_1.pdf
- elife_poa_e53402_Figure_5_figure_supplement_3.pdf
- elife_poa_e53402_Figure_3_figure_supplement_2.pdf
- elife_poa_e53402_Figure_2_figure_supplement_1.pdf
- elife_poa_e53402_Figure_4_figure_supplement_1.pdf
- elife_poa_e53402_Figure_1_figure_supplement_1.pdf
- elife_poa_e53402_Figure_4_figure_supplement_2.pdf
- elife_poa_e53402_Video_1.mp4
- elife_poa_e53402_Video_4.avi
- elife_poa_e53402_Figure_5_figure_supplement_2.pdf
- elife_poa_e53402_Video_3.avi
- elife_poa_e53402_Figure_6_figure_supplement_1.pdf
- elife_poa_e53402_Transparent_Reporting_File.docx
