# Supplementary figures and images for: Kinesin Kif2C in regulation of DNA double strand break dynamics and repair
Source: eLife journal article supplement (doi:10.7554/elife.53402), 2020-01-17

**A**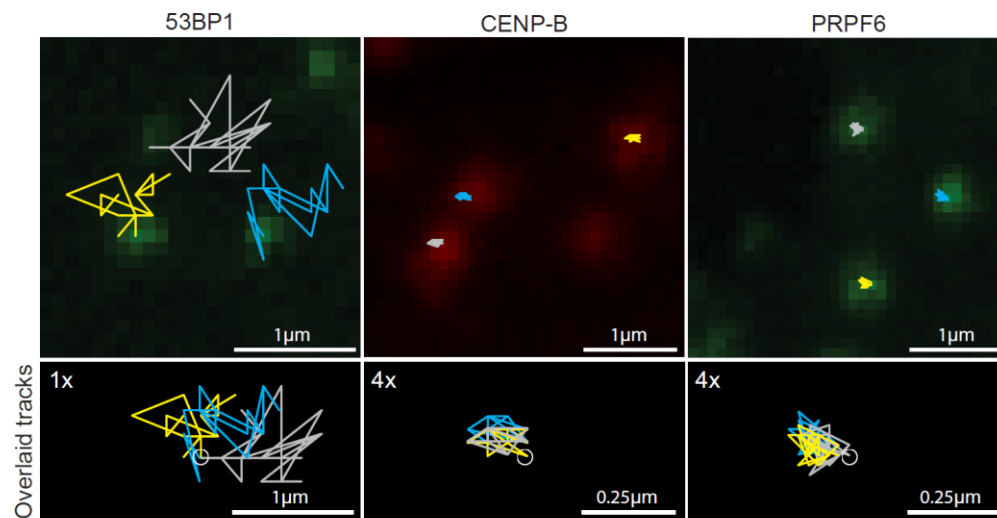**B**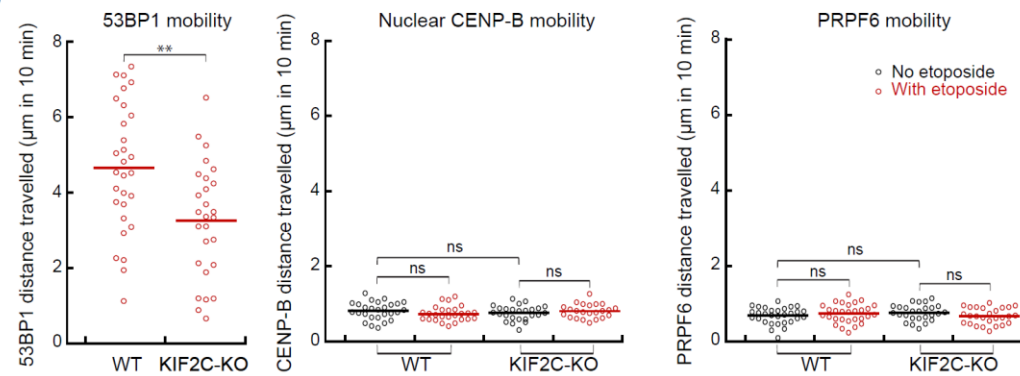**C**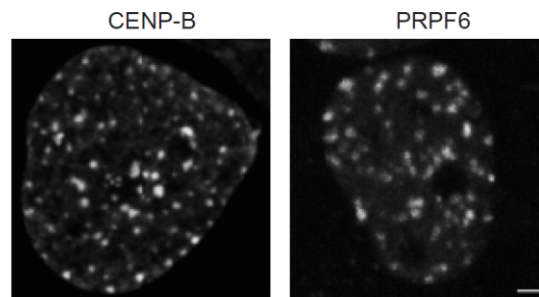

Supplement: supp [file elife-53402-supp-v1.zip]

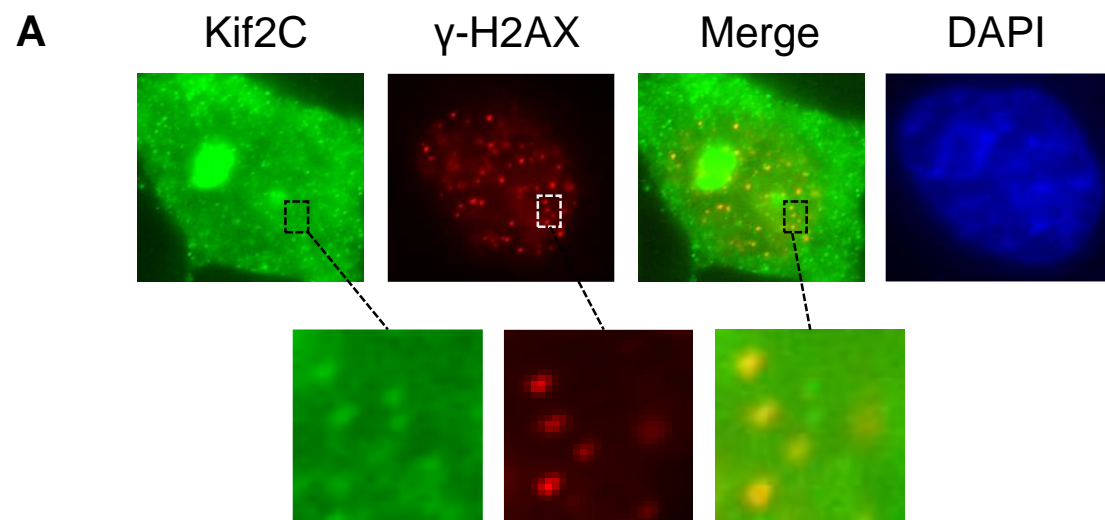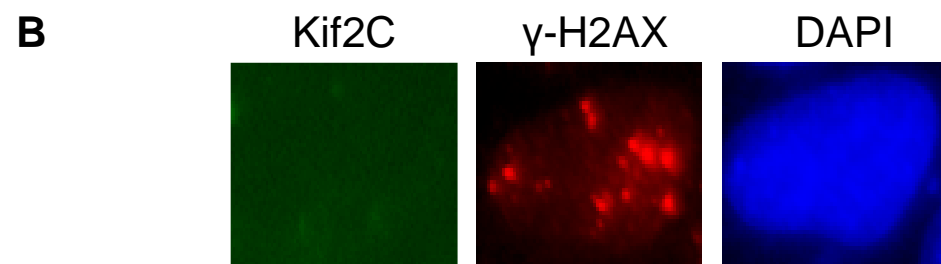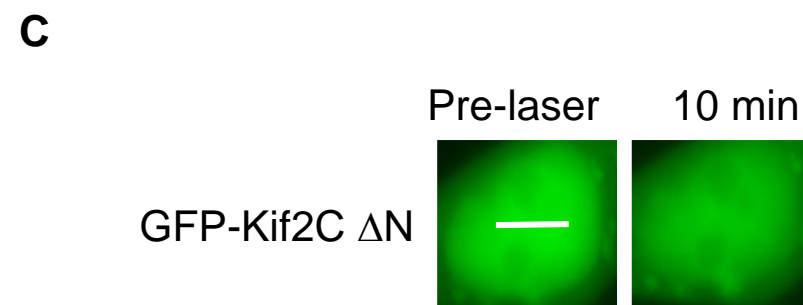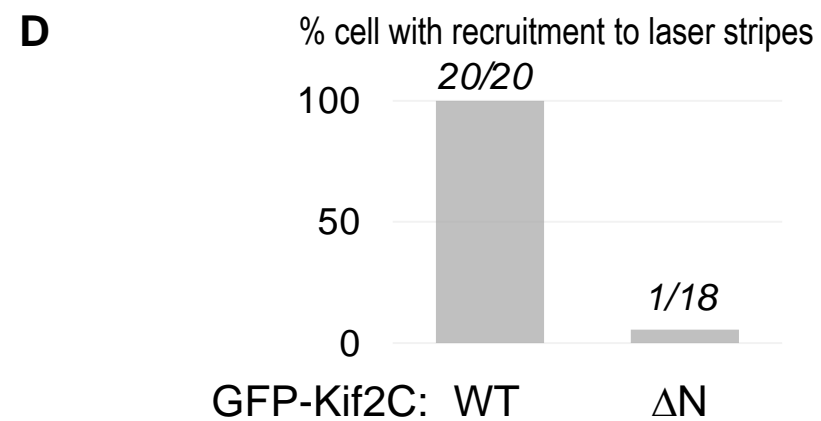

Supplement: supp [file elife-53402-supp-v1.zip]

**A**

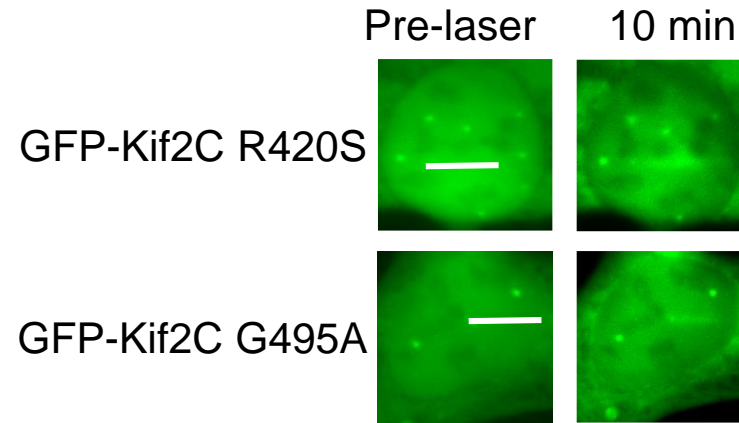

**B**

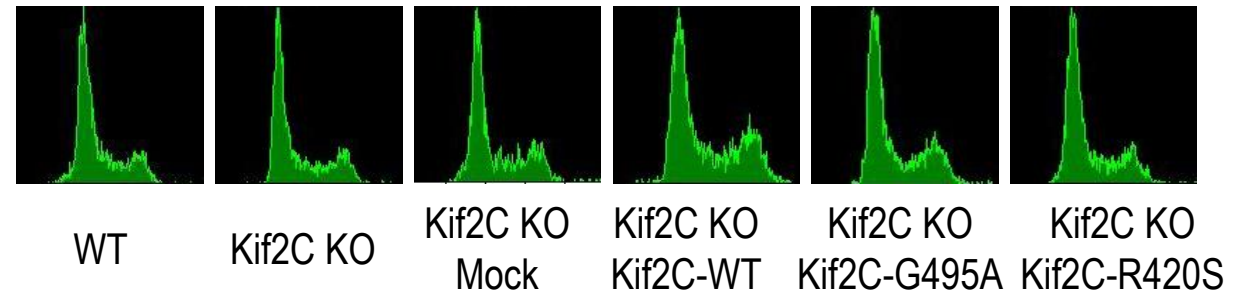

Supplement: supp [file elife-53402-supp-v1.zip]

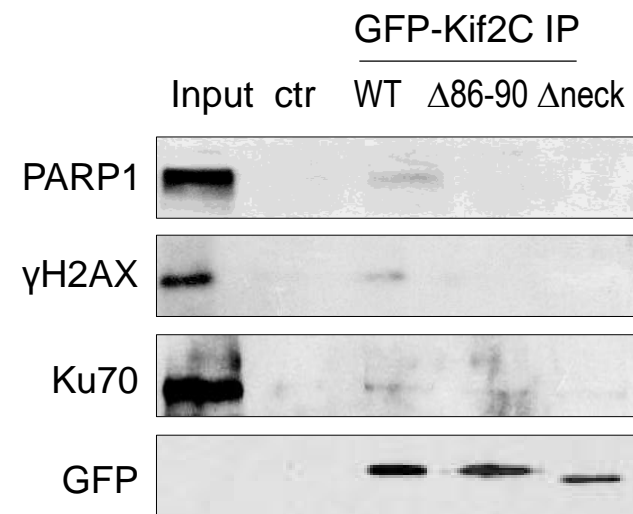

Supplement: supp [file elife-53402-supp-v1.zip]

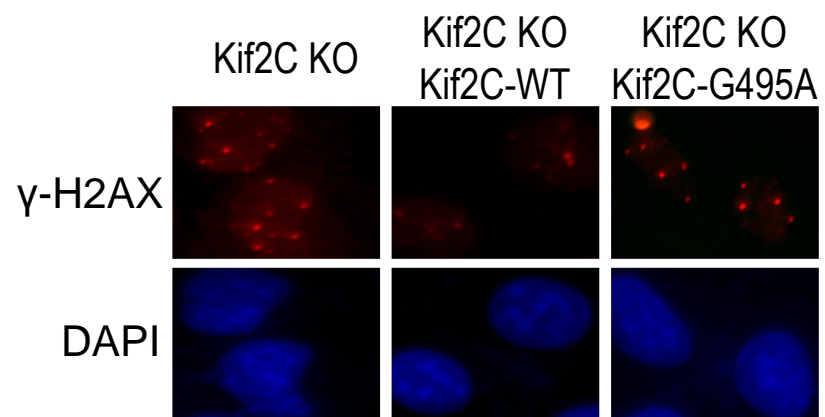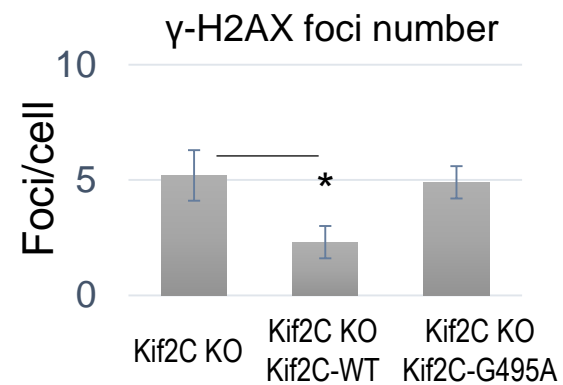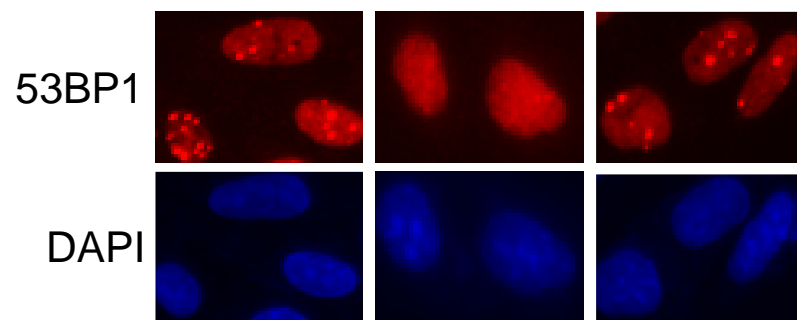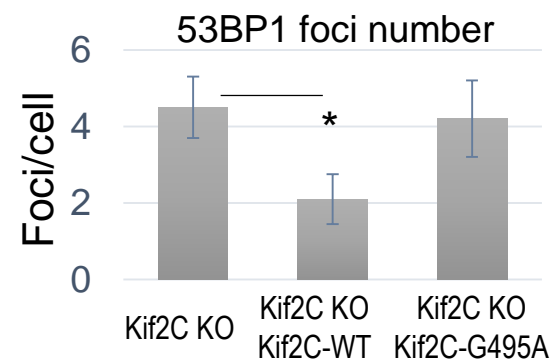

Supplement: supp [file elife-53402-supp-v1.zip]

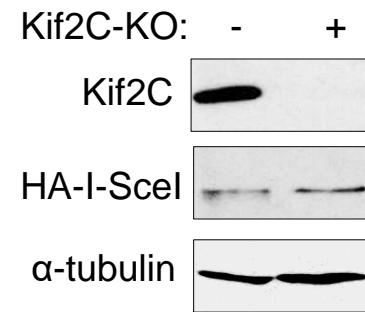

Supplement: supp [file elife-53402-supp-v1.zip]

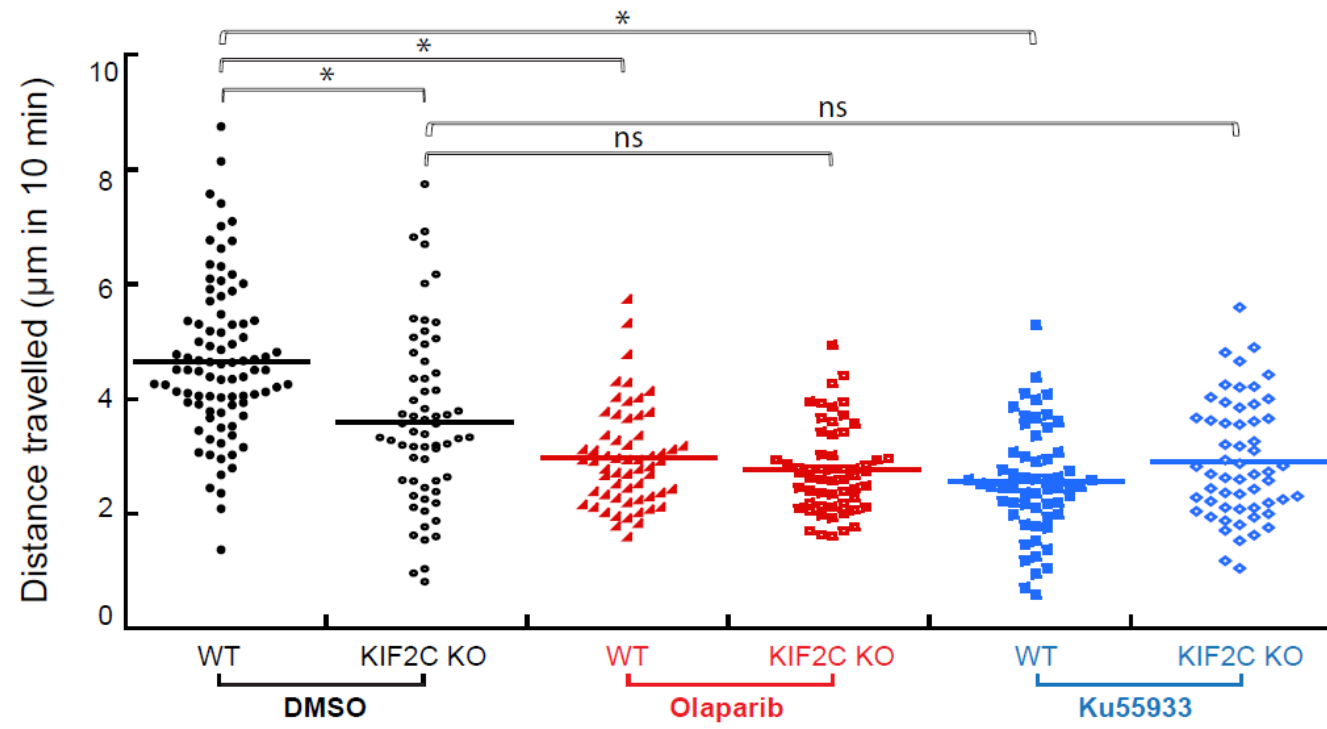

Supplement: supp [file elife-53402-supp-v1.zip]

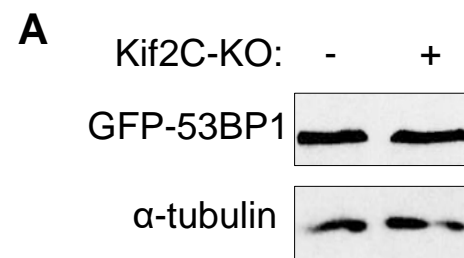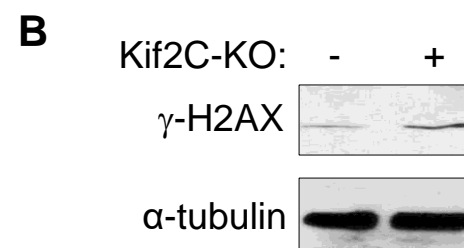

Supplement: supp [file elife-53402-supp-v1.zip]

**A**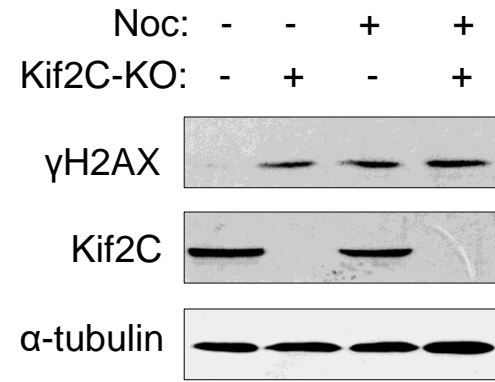**B**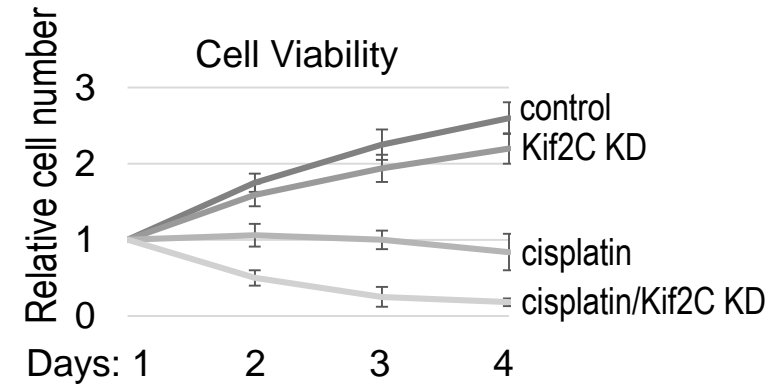**C**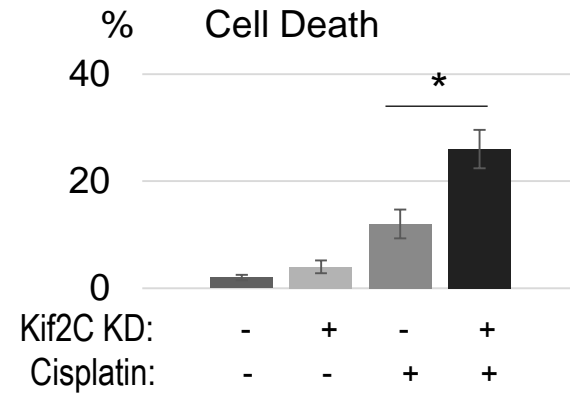**D**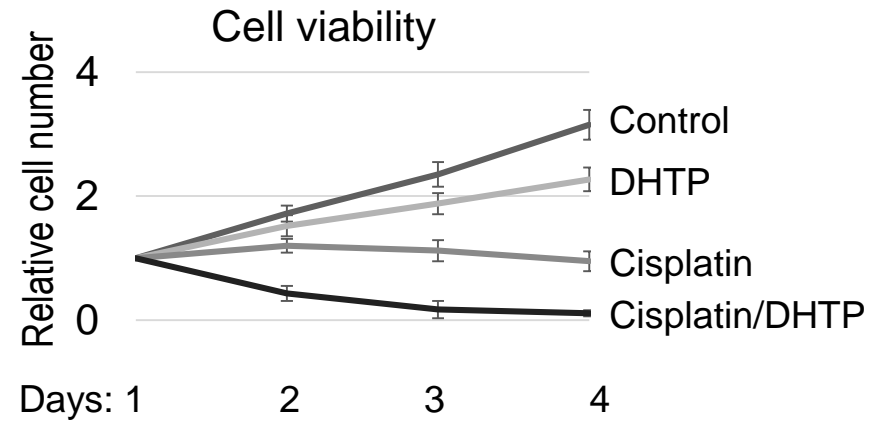

Supplement: supp [file elife-53402-supp-v1.zip › elife_poa_e53402_Figure_3_figure_supplement_3.pdf]

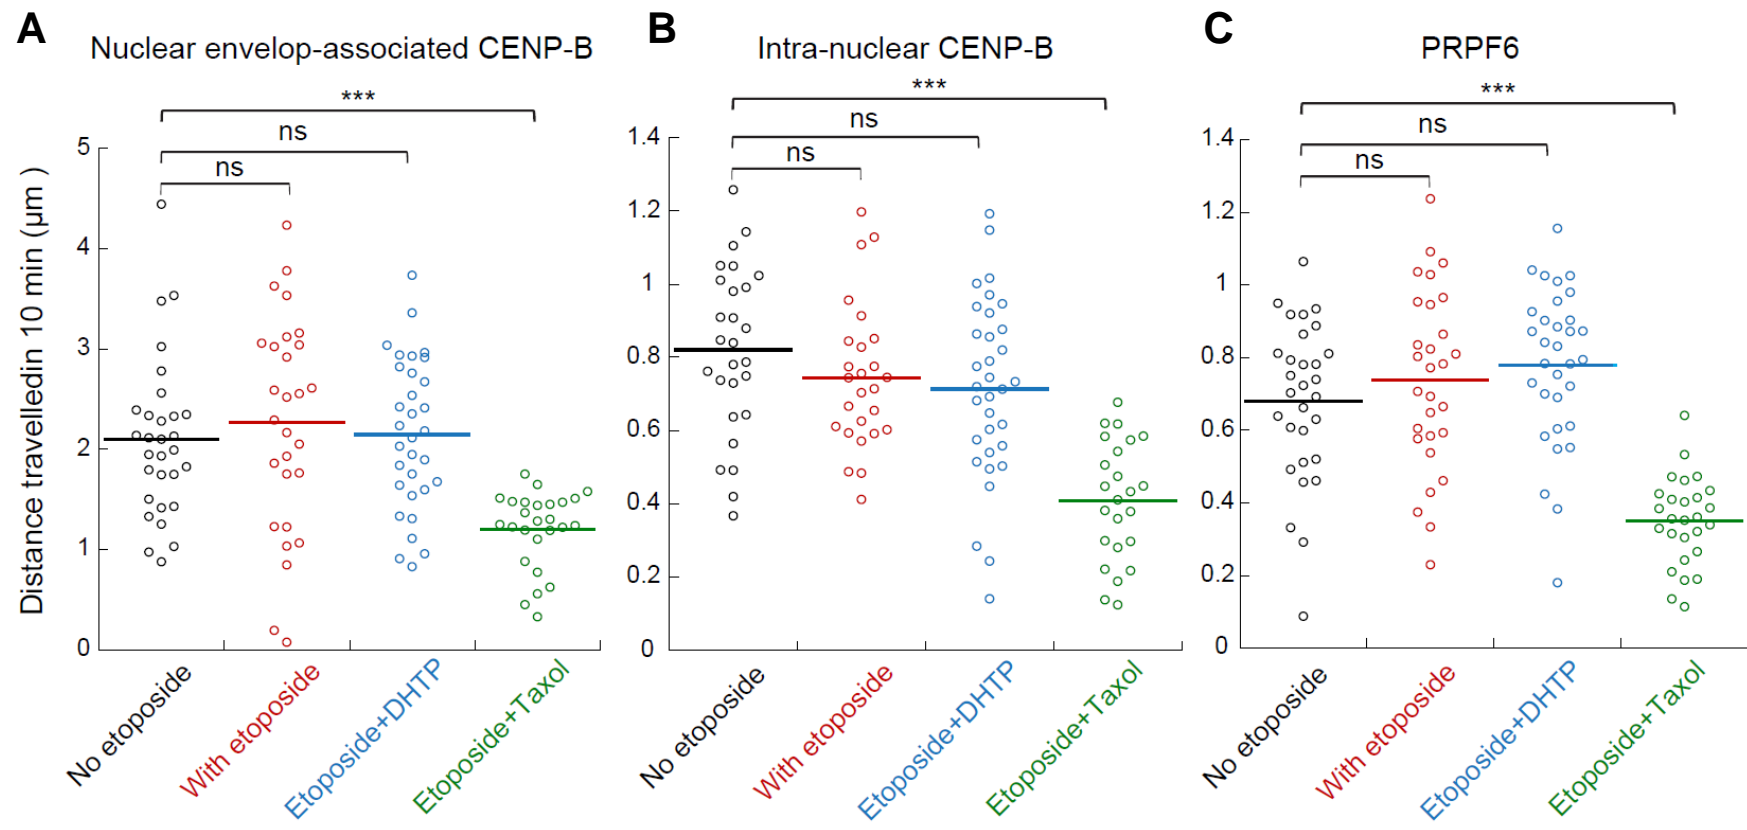

Supplement: supp [file elife-53402-supp-v1.zip › elife_poa_e53402_Figure_5_figure_supplement_3.pdf]

Kif2C

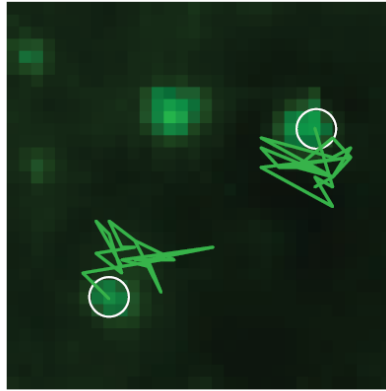

53BP1

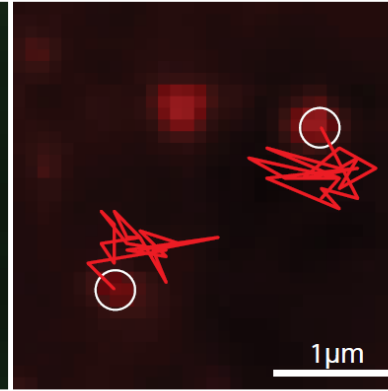

Overlaid tracks

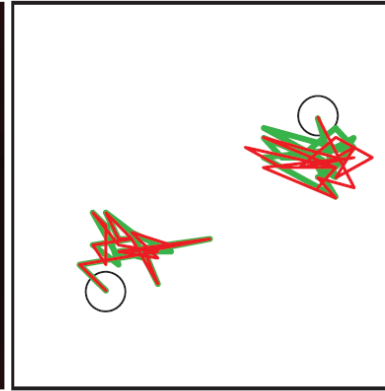

Supplement: supp [file elife-53402-supp-v1.zip › elife_poa_e53402_Figure_2_figure_supplement_1.pdf]

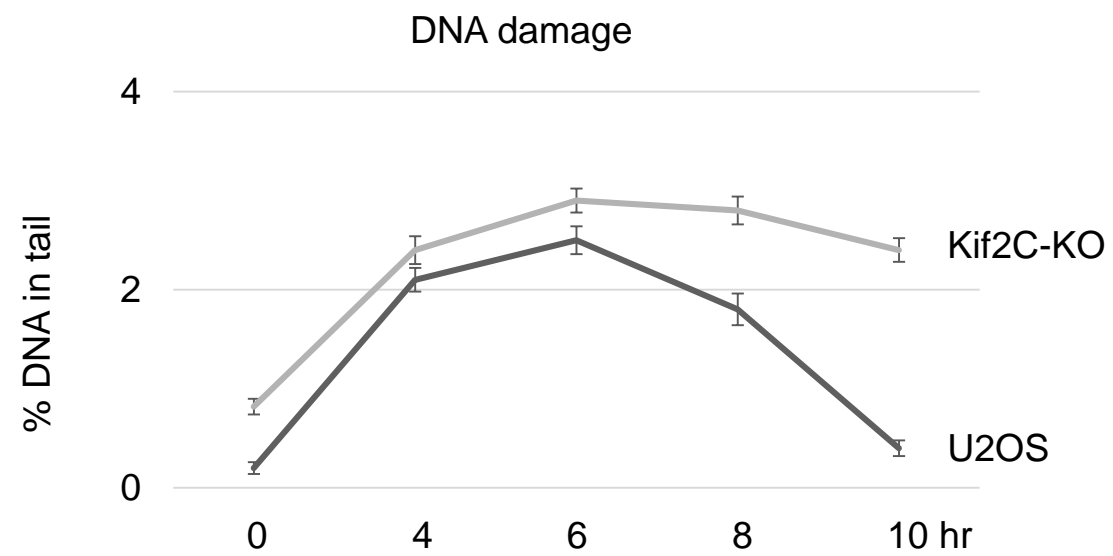

Supplement: supp [file elife-53402-supp-v1.zip › elife_poa_e53402_Figure_4_figure_supplement_1.pdf]

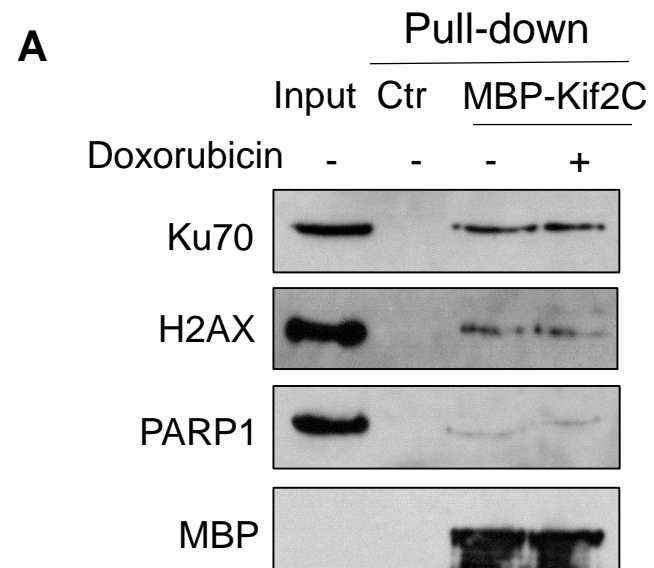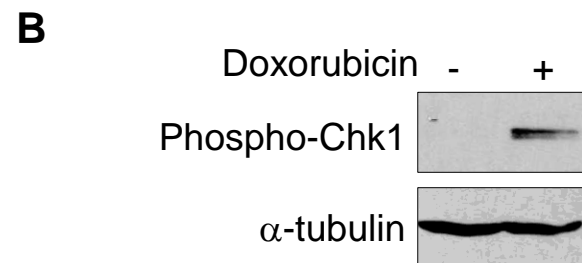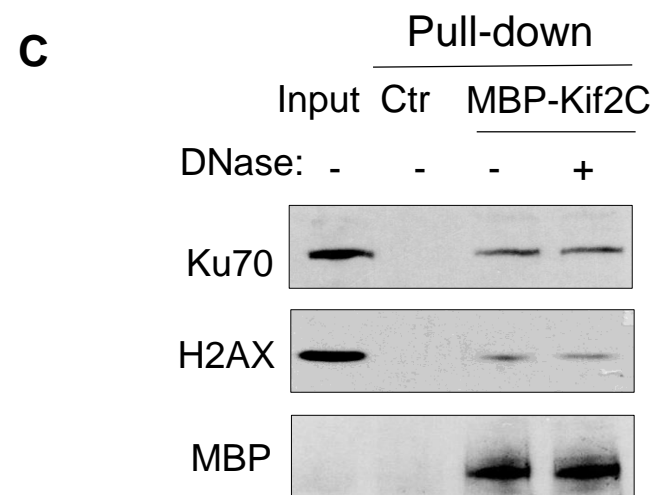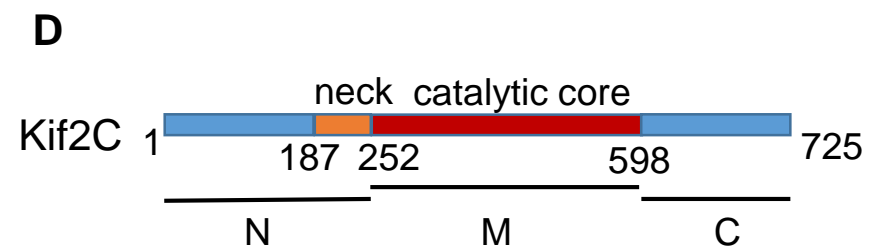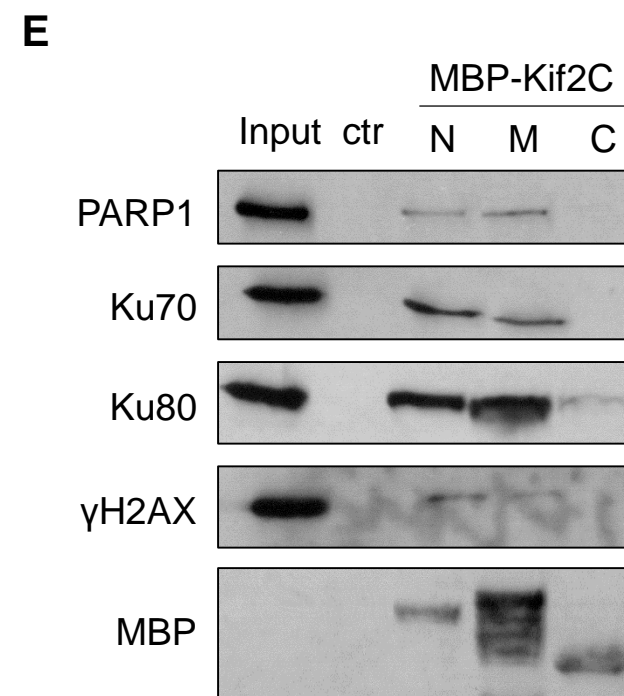

Supplement: supp [file elife-53402-supp-v1.zip › elife_poa_e53402_Figure_1_figure_supplement_1.pdf]
